# Supplementary material
Source: MDPI journal article supplement (https://www.mdpi.com/2227-9040/11/4/232)
Supplement: s1 [file s1]

Article

## Supplement Information

# Rapid Fabrication of Homogeneous Submicron Silver Particles via Microfluidic Chip and Use as a SERS Detection Substrate

Junjie Chen <sup>1,†</sup>, Suyang Li <sup>2,†</sup>, Fuqi Yao <sup>1</sup>, Wanbing Xu <sup>2</sup>, Yunfeng Li <sup>3</sup> and Qiang Chen <sup>1,\*</sup>, Pei Liang <sup>2,\*</sup>

<sup>1</sup> College of Metrology and Measurement Engineering, China Jiliang University, Hangzhou 310018, China

<sup>2</sup> College of Optical and Electronic Technology, China Jiliang University, Hangzhou 310018, China

<sup>3</sup> College of information Engineering, China Jiliang University, Hangzhou 310018, China

\* Correspondence: chenqiang\_cjlu@cjl.u.edu.cn (Q.C.); plianghust@cjl.u.edu.cn (P.L).

† These authors contributed equally to this work.

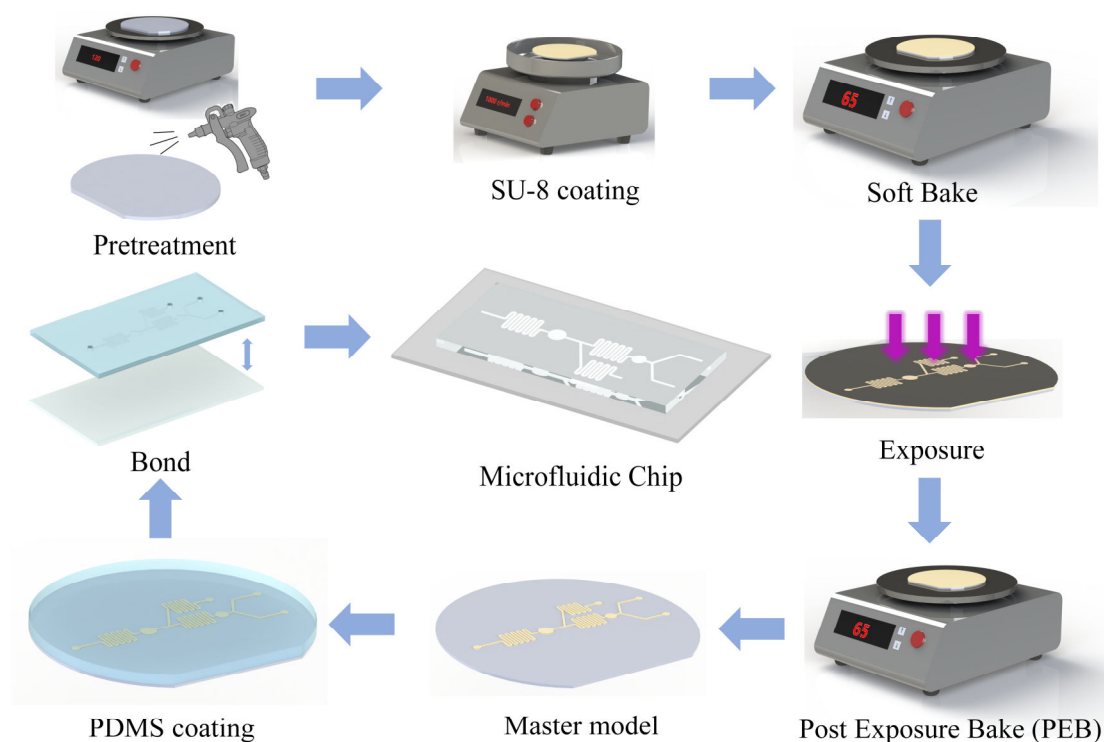

**Figure S1.** Method for manufacturing PDMS chip.

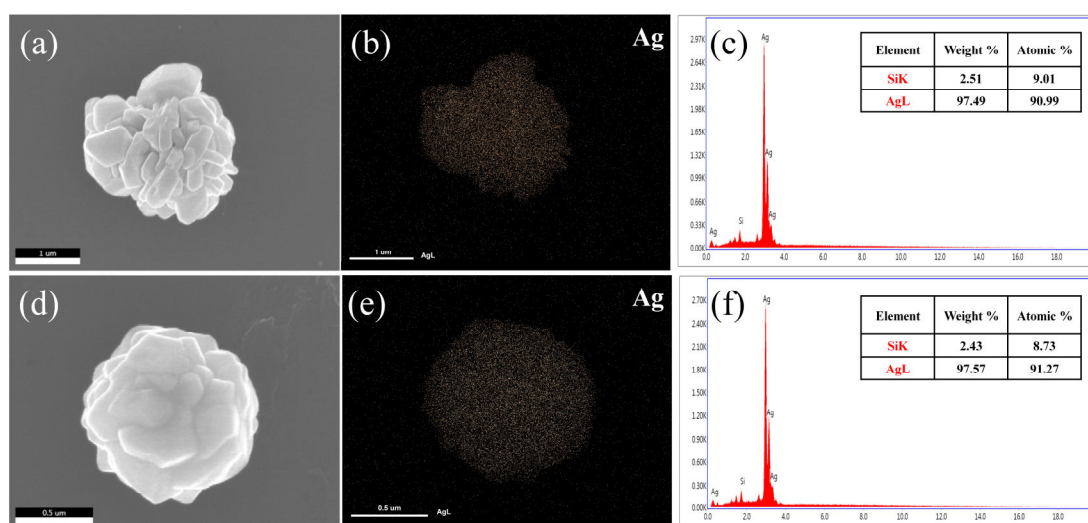

**Figure S2.** Typical EDS spectrum of flower-like silver particles (a–c) and quasi-spherical silver particles (d–f).

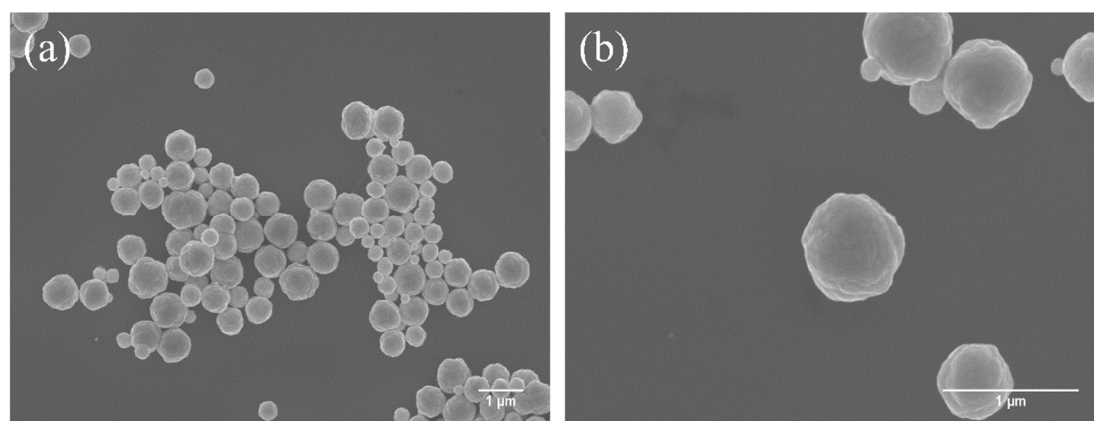

**Figure S3.** Silver particles synthesized in conventional equipment.

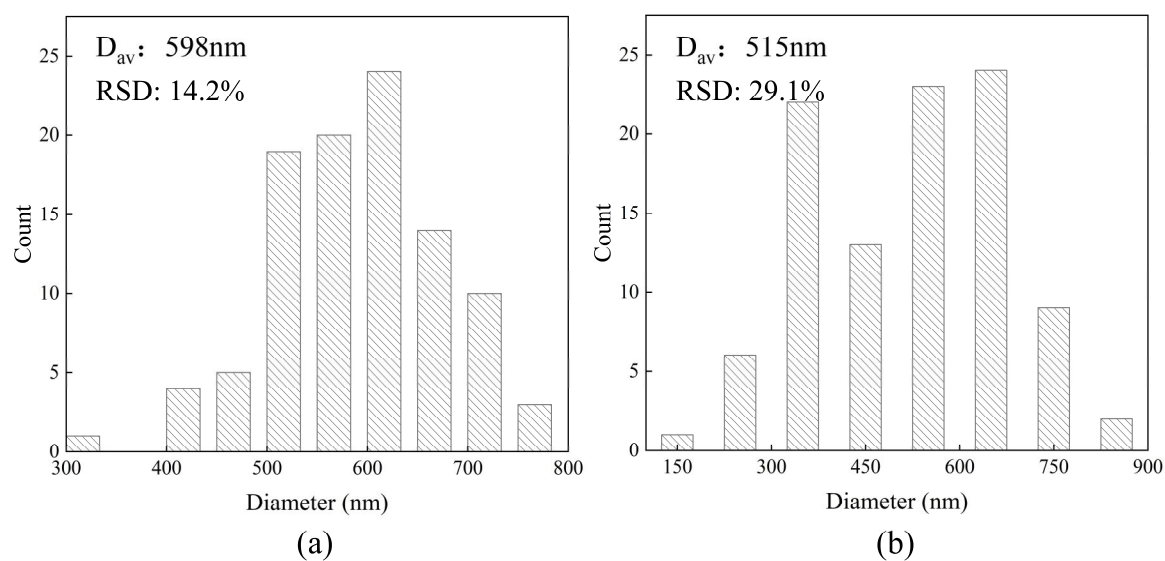

**Figure S4.** Particle size distribution histograms of particles prepared by microfluidic chips and conventional methods. (a) Particle size distribution histogram of the particles prepared by the microfluidic chip; (b) Particle size distribution histogram of particles prepared by traditional method.

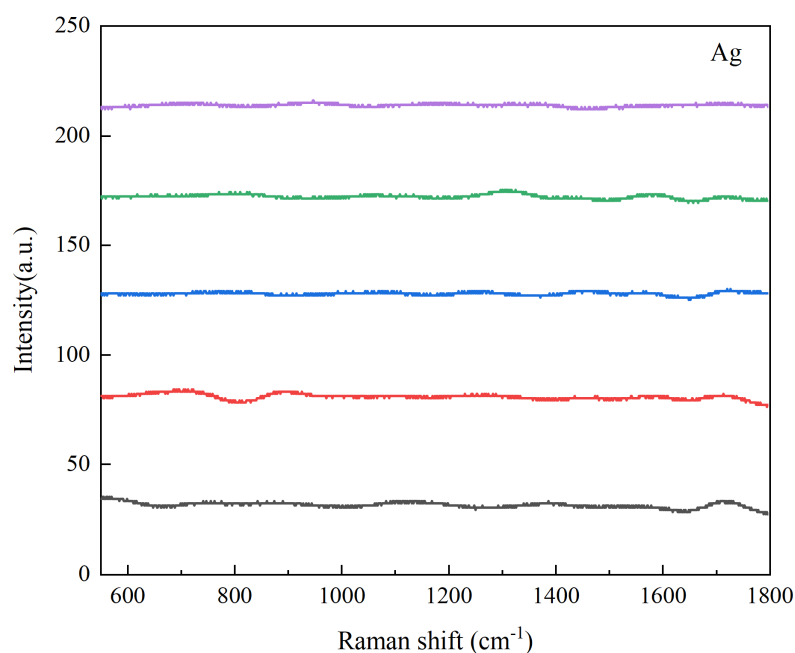

**Figure S5.** SERS blank control signals detected at five different positions when quasi-spherical silver particles were used as the SERS substrate.

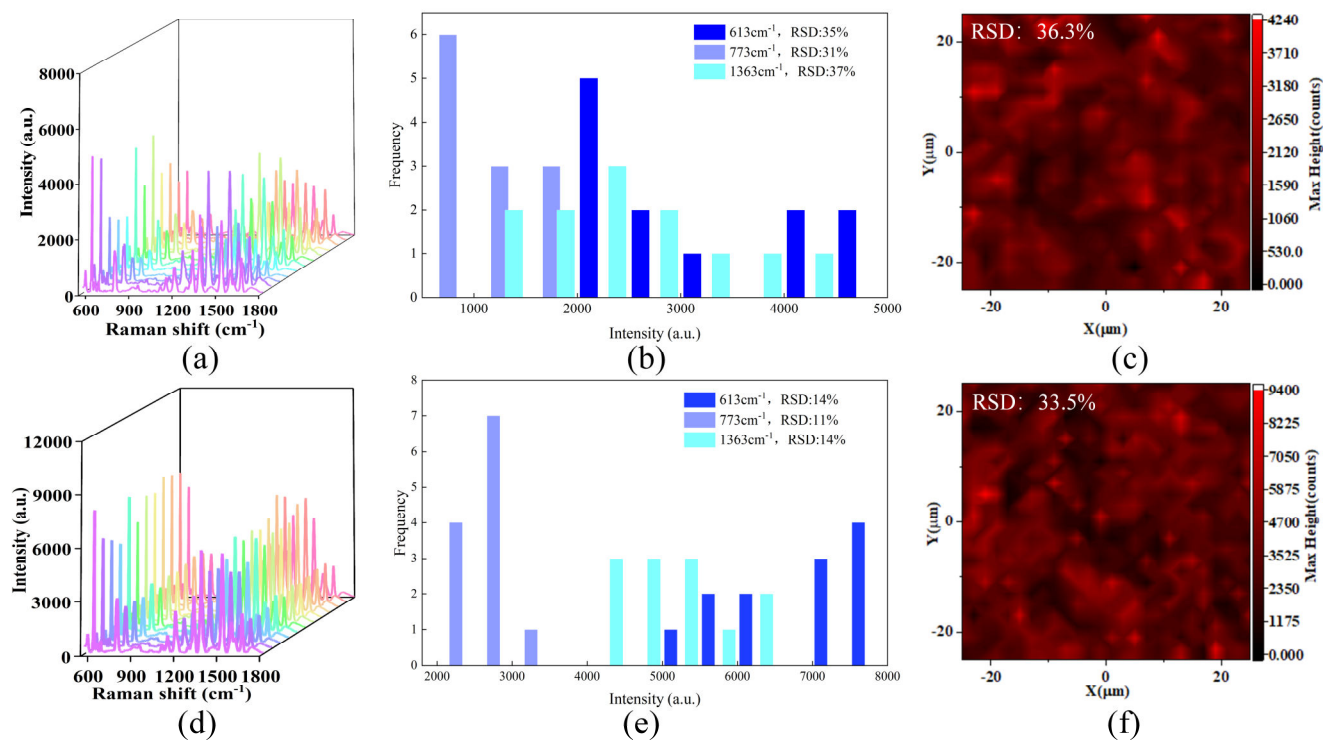

**Figure S6.** Reproducibility of flower-like silver particles (a–c) and quasi-spherical silver particles (d–f). (a) and (d): Silver particles with two morphologies were used as Raman substrates for signal intensities of SERS measurements at 12 different locations; (b) and (e): Relative standard deviation of SERS intensities for characteristic peaks at 613 cm<sup>-1</sup>, 773 cm<sup>-1</sup>, 1363 cm<sup>-1</sup>; (c) and (f): Raman mapping image of R6G (10<sup>-6</sup> M) with all peak intensities at 613 cm<sup>-1</sup>.

**Table S1.** Assignments of Raman bands of R6G in SERS and normal Raman conditions.

| <b>Raman</b> | <b>SERS</b> | <b>Assignment</b>                                                            |
|--------------|-------------|------------------------------------------------------------------------------|
| 1649         | 1651        | xanthene ring stretch; C-H in-plane bending                                  |
| 1502         | 1511        | xanthene ring stretch; C-N stretch; C-H bend; N-H bend                       |
| 1362         | 1363        | xanthene ring stretch; C-H in-plane bending                                  |
| 773          | 773         | C-H out of plane bend; xanthene ring in-plane deformations                   |
| 613          | 613         | xanthene ring in-plane deformations; xanthene ring out-of-plane deformations |
